# Supplementary material
Source: Springer Nature journal article supplement (https://www.springermedizin.de/resource/supplementary/13045_2010_120_MOESM3_ESM.pdf/9660696)

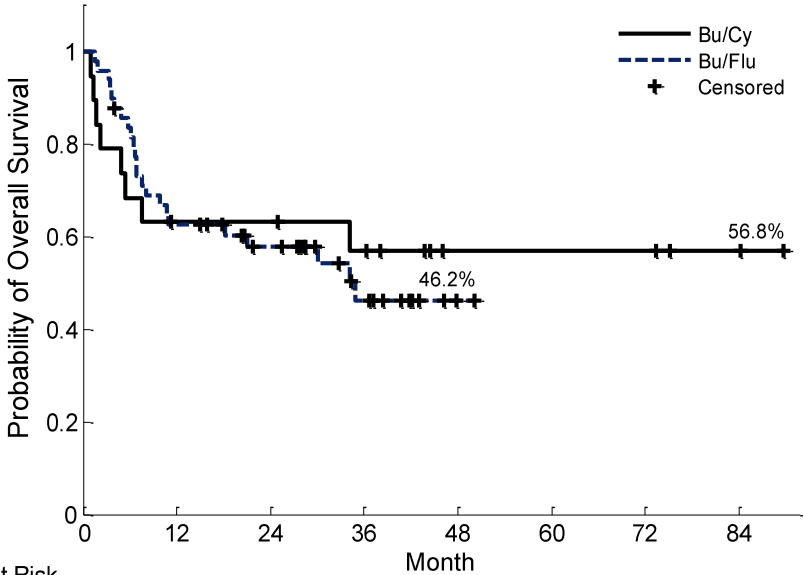

No. at Risk

Bu/Cy

Bu/Flu

19

49

11

30

11

22

9

11

4

1

4

0

4

0

2

0

Month

0

12

24

36

48

60

72

84

0

0.2

0.4

0.6

0.8

1

Probability of Overall Survival

46.2%

56.8%

Supplement: MOESM3 [file 9660696]
